# Supplementary material
Source: PubMed Central journal article supplement (PMC4014974)
Supplement: jdi-2-318-s1.pdf [file jdi-2-318-s1.pdf]

**Table S1.** Changes in anthropometric measurements, alanine aminotransferase (ALT), serum creatinine, and serum lipid profiles during the 12-week supplementation with mulberry leaf extract (6 mg 1-deoxynojirimycin, thrice daily) or placebo followed by 4-week observation without supplementation (Study 2)

| Parameter/Group                        | Baseline    | Week 4                   | Week 8                   | Week 12                  | Posttreatment observation (week 16) |
|----------------------------------------|-------------|--------------------------|--------------------------|--------------------------|-------------------------------------|
| <b>Body weight (kg)</b>                |             |                          |                          |                          |                                     |
| Mulberry leaf extract                  | 67.0 ± 9.4  | 66.5 ± 9.7 <sup>†</sup>  | 66.4 ± 9.4 <sup>†</sup>  | 66.2 ± 9.5 <sup>†</sup>  | 66.1 ± 10.0 <sup>†</sup>            |
| Placebo                                | 67.7 ± 11.3 | 67.1 ± 11.4 <sup>†</sup> | 67.1 ± 11.5 <sup>†</sup> | 67.0 ± 11.5 <sup>†</sup> | 66.8 ± 11.4 <sup>†</sup>            |
| <b>BMI (kg/m<sup>2</sup>)</b>          |             |                          |                          |                          |                                     |
| Mulberry leaf extract                  | 24.7 ± 2.4  | 24.5 ± 2.5 <sup>†</sup>  | 24.5 ± 2.4 <sup>†</sup>  | 24.4 ± 2.4 <sup>†</sup>  | 24.2 ± 2.4 <sup>†</sup>             |
| Placebo                                | 24.5 ± 2.6  | 24.3 ± 2.7 <sup>†</sup>  | 24.3 ± 2.7 <sup>†</sup>  | 24.2 ± 2.7 <sup>†</sup>  | 24.1 ± 2.7 <sup>†</sup>             |
| <b>Waist circumference (cm)</b>        |             |                          |                          |                          |                                     |
| Mulberry leaf extract                  | 86.0 ± 6.8  | 86.0 ± 7.1               | 85.2 ± 6.6               | 85.7 ± 6.9               | 85.8 ± 7.0                          |
| Placebo                                | 85.9 ± 8.0  | 86.3 ± 8.3               | 85.8 ± 8.4               | 86.0 ± 8.2               | 85.6 ± 8.6                          |
| <b>Waist/hip ratio</b>                 |             |                          |                          |                          |                                     |
| Mulberry leaf extract                  | 0.88 ± 0.04 | 0.88 ± 0.05              | 0.88 ± 0.04              | 0.88 ± 0.05              | 0.89 ± 0.05 <sup>†</sup>            |
| Placebo                                | 0.88 ± 0.05 | 0.89 ± 0.05 <sup>†</sup> | 0.89 ± 0.05 <sup>†</sup> | 0.89 ± 0.05              | 0.89 ± 0.06                         |
| <b>Systolic blood pressure (mmHg)</b>  |             |                          |                          |                          |                                     |
| Mulberry leaf extract                  | 121 ± 14    | 122 ± 13                 | 118 ± 17                 | 121 ± 13                 | 116 ± 13                            |
| Placebo                                | 123 ± 16    | 123 ± 15                 | 123 ± 16                 | 121 ± 16                 | 122 ± 14                            |
| <b>Diastolic blood pressure (mmHg)</b> |             |                          |                          |                          |                                     |
| Mulberry leaf extract                  | 76 ± 8      | 75 ± 7                   | 75 ± 10                  | 76 ± 7                   | 74 ± 8                              |
| Placebo                                | 77 ± 11     | 75 ± 10                  | 79 ± 11                  | 77 ± 10                  | 75 ± 10                             |
| <b>ALT (U/L)</b>                       |             |                          |                          |                          |                                     |
| Mulberry leaf extract                  | 23.7 ± 10.4 | 23.9 ± 10.9              | 21.8 ± 9.2               | 22.8 ± 8.8               | 21.3 ± 8.4                          |
| Placebo                                | 24.7 ± 11.5 | 23.3 ± 8.8               | 22.7 ± 10.3              | 25.2 ± 11.7              | 23.7 ± 11.3                         |
| <b>Creatinine (mg/dL)</b>              |             |                          |                          |                          |                                     |
| Mulberry leaf extract                  | 0.94 ± 0.17 | 0.97 ± 0.15              | 0.96 ± 0.18              | 0.93 ± 0.18              | 0.88 ± 0.19 <sup>†</sup>            |
| Placebo                                | 0.98 ± 0.18 | 0.98 ± 0.17              | 0.99 ± 0.16              | 0.95 ± 0.17              | 0.92 ± 0.16 <sup>†</sup>            |
| <b>Total cholesterol (mg/dL)</b>       |             |                          |                          |                          |                                     |
| Mulberry leaf extract                  | 210 ± 29    | 210 ± 31                 | 210 ± 29                 | 206 ± 29                 | 204 ± 28                            |
| Placebo                                | 214 ± 25    | 209 ± 29                 | 215 ± 28                 | 209 ± 27                 | 204 ± 24                            |
| <b>LDL cholesterol (mg/dL)</b>         |             |                          |                          |                          |                                     |
| Mulberry leaf extract                  | 133 ± 30    | 133 ± 34                 | 127 ± 29                 | 125 ± 27                 | 128 ± 29                            |
| Placebo                                | 133 ± 23    | 131 ± 23                 | 130 ± 26                 | 123 ± 28 <sup>†</sup>    | 127 ± 25                            |
| <b>HDL cholesterol (mg/dL)</b>         |             |                          |                          |                          |                                     |
| Mulberry leaf extract                  | 59 ± 14     | 56 ± 15                  | 55 ± 13 <sup>†</sup>     | 54 ± 13 <sup>†</sup>     | 55 ± 13 <sup>†</sup>                |
| Placebo                                | 60 ± 17     | 60 ± 18                  | 59 ± 17                  | 55 ± 15 <sup>†</sup>     | 56 ± 14 <sup>†</sup>                |
| <b>Triglycerides (mg/dL)</b>           |             |                          |                          |                          |                                     |
| Mulberry leaf extract                  | 137 ± 77    | 147 ± 97                 | 170 ± 148                | 144 ± 87                 | 136 ± 84                            |
| Placebo                                | 133 ± 78    | 127 ± 72                 | 136 ± 85                 | 154 ± 90                 | 128 ± 67                            |

Data are mean ± SD ( $n = 33$  in the extract group,  $n = 32$  in the placebo group). <sup>†</sup>Significantly different from the baseline value ( $P < 0.05$  with Bonferroni correction). No significant differences were observed at any time points between mulberry leaf extract and placebo groups (unpaired  $t$ -test).

**Table S2.** Dietary intake, alcohol consumption and pedometer count during the 12-week supplementation with mulberry leaf extract (6 mg 1-deoxynojirimycin, thrice daily) or placebo followed by 4-week observation without supplementation (Study 2)

| Parameter/Group             | Baseline                | Week 4       | Week 8       | Week 12      | Posttreatment observation (week 16) |
|-----------------------------|-------------------------|--------------|--------------|--------------|-------------------------------------|
| <b>Dietary intake</b>       |                         |              |              |              |                                     |
| Total energy (kcal/day)     |                         |              |              |              |                                     |
| Mulberry leaf extract       | 2006 ± 487 <sup>‡</sup> | 2053 ± 400   | 2049 ± 410   | 2061 ± 435   | 2079 ± 436                          |
| Placebo                     | 2236 ± 430              | 2175 ± 509   | 2165 ± 467   | 2278 ± 522   | 2279 ± 544                          |
| Carbohydrate (g/day)        |                         |              |              |              |                                     |
| Mulberry leaf extract       | 357 ± 141               | 376 ± 119    | 361 ± 139    | 391 ± 129    | 378 ± 136                           |
| Placebo                     | 383 ± 112               | 383 ± 158    | 392 ± 161    | 372 ± 145    | 367 ± 135                           |
| Protein (g/day)             |                         |              |              |              |                                     |
| Mulberry leaf extract       | 70 ± 16                 | 75 ± 14      | 71 ± 14      | 72 ± 14      | 72 ± 18                             |
| Placebo                     | 78 ± 17                 | 77 ± 21      | 76 ± 18      | 78 ± 18      | 79 ± 22                             |
| Fat (g/day)                 |                         |              |              |              |                                     |
| Mulberry leaf extract       | 67 ± 18                 | 68 ± 20      | 69 ± 17      | 67 ± 19      | 65 ± 22                             |
| Placebo                     | 71 ± 18                 | 70 ± 23      | 68 ± 20      | 72 ± 23      | 67 ± 18                             |
| Cholesterol (mg/day)        |                         |              |              |              |                                     |
| Mulberry leaf extract       | 294 ± 73                | 253 ± 56     | 252 ± 50     | 260 ± 66     | 265 ± 46                            |
| Placebo                     | 279 ± 60                | 273 ± 66     | 269 ± 60     | 286 ± 53     | 289 ± 57                            |
| Fiber (g/day)               |                         |              |              |              |                                     |
| Mulberry leaf extract       | 11.6 ± 3.9              | 12.1 ± 3.5   | 11.5 ± 3.8   | 11.2 ± 3.4   | 11.8 ± 3.2                          |
| Placebo                     | 12.8 ± 4.1              | 12.9 ± 5.4   | 13.3 ± 5.4   | 13.0 ± 3.9   | 12.7 ± 4.2                          |
| Alcohol consumption (g/day) |                         |              |              |              |                                     |
| Mulberry leaf extract       | 13.4 ± 19.4             | 14.7 ± 20.8  | 14.7 ± 18.4  | 14.7 ± 17.9  | 16.3 ± 19.3                         |
| Placebo                     | 19.3 ± 23.4             | 17.9 ± 21.1  | 18.7 ± 24.6  | 19.8 ± 24.5  | 20.4 ± 25.1                         |
| Pedometer count (steps/day) |                         |              |              |              |                                     |
| Mulberry leaf extract       | 9638 ± 3941             | 9153 ± 3227  | 9461 ± 3601  | 9016 ± 3698  | 9093 ± 3525                         |
| Placebo                     | 10524 ± 4757            | 10199 ± 4431 | 10201 ± 4329 | 10287 ± 4708 | 9877 ± 4571                         |

Data are mean ± SD ( $n = 33$  in the extract group,  $n = 32$  in the placebo group). <sup>‡</sup>Significantly different from the value of placebo group ( $P < 0.05$  by unpaired  $t$ -test). No measurements were significantly changed from the baseline values over the trial period (Bonferroni correction).
